# Supplementary material for: Investigation of the agglomeration reduction mechanism of the aluminized HTPB propellant containing ferric perfluorooctanoate [Fe(PFO)3]
Source: Royal Society of Chemistry journal article supplement (doi:10.1039/c9ra02393c), 2019-01-01
Supplement: c9ra02393c2.pdf [file c9ra02393c2.pdf]

## Supplementary materials

According to some research works, PTFE is always suggested to be a good additive to suppress Al agglomeration in solid composite propellant. To better compare the effect of PTFE and  $\text{Fe}(\text{PFO})_3$ , some extended and contrastive characterizations were performed on the aluminized HTPB propellant separately containing  $\text{Fe}(\text{PFO})_3$  and raw PTFE powder. The related results are stated here including particle size analysis of solid combustion products, the successive snapshots of combustion process, and morphology of solid combustion products separately corresponding to **Suppl. 1**, **Suppl. 2** and **Suppl. 3**.

Suppl. 1 Particle-size distribution parameters of collected solid combustion products.

| Samples         | Particle-size distribution parameters |                               |                               | Sum volume fraction<br>(%, $D \geq 10 \mu\text{m}$ ) |
|-----------------|---------------------------------------|-------------------------------|-------------------------------|------------------------------------------------------|
|                 | $D_{10}$<br>( $\mu\text{m}$ )         | $D_{50}$<br>( $\mu\text{m}$ ) | $D_{90}$<br>( $\mu\text{m}$ ) |                                                      |
| $S_0$           | 0.19                                  | 2.36                          | <b>35.04</b>                  | 27.48                                                |
| $S_{3\%PTFE}$   | 0.31                                  | 4.63                          | <b>15.55</b>                  | 19.26                                                |
| $S_{3\%FePFO3}$ | 0.21                                  | 2.33                          | <b>9.35</b>                   | 10.95                                                |

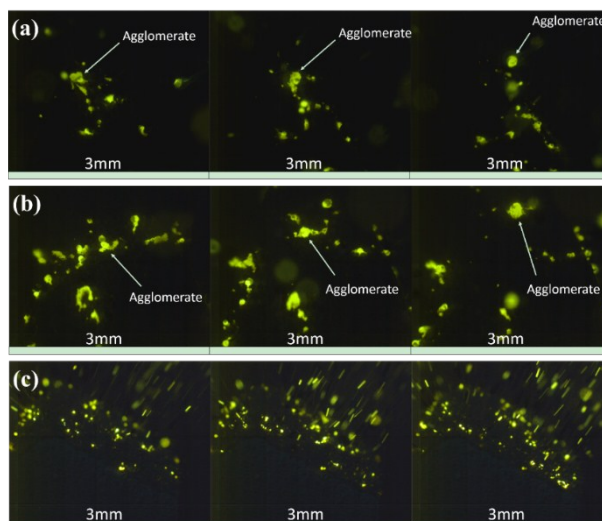

Suppl. 2 Burning surface characteristics corresponding to  $S_0$  (a),  $S_{3\%PTFE}$  (b) and  $S_{3\%FePFO3}$  (c); it can clearly be seen that  $S_{3\%FePFO3}$  suppressed combustion agglomeration on surface much better than both  $S_0$  and  $S_{3\%PTFE}$ .

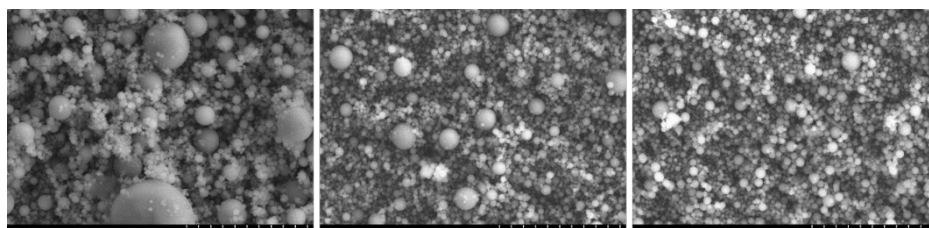

Suppl. 3 Morphology of solid combustion product corresponding to  $S_0$  (left),  $S_{3\%PTFE}$  (middle) and  $S_{3\%FePFO3}$  (right), small particle size also indicates higher combustion efficiency in experience.

The effects of  $\text{Fe}(\text{PFO})_3$  and raw PTFE powders as additive were compared. The results show that PTFE presented some agglomeration-reducing effect but not as good as  $\text{Fe}(\text{PFO})_3$ . We attribute this to that, in the research works of others, PTFE was usually suggested to be ball-milled with aluminum as a composite metal fuel firstly and then to be employed in the propellant formulation, however, there is no modification on the PTFE powder in our work.
